# Supplementary material
Source: publisher figshare collection journal article supplement (https://geolsoc.figshare.com/ndownloader/files/26183038)
Supplement: Supplementary file 1 [file 26183038]

## Sheet: GM-ES-3
Age	NF Zone	Depth (M)	Anfractus shilohensis	Axopodorhabdus albianus	Biscutum constans	Biscutum gaultensis	Braarudosphaera primula	Braarudosphaera quinquecostata	Braarudosphaera stenorhetha	Braarudosphaera dodekahedron	Broinsonia cenomanica	Broinsonia enormis	Broinsonia galloisii	Broinsonia signata	Bukrylithus ambiguus	Calcicalathina alta	Calculites sp.	Chiastozygus litterarius	Corollithion kennedyi	Corollithion signum	Cribrosphaerella ehrenbergii	Crucicribrum anglicum	Cylindralithus coronatus	Discorhabdus ignotus	Eiffellithus eximius	Eiffellithus paragogus	Eiffellithus turriseiffelii	Eiffellithus monechiae	Eiffellithus vonsalisiae	Eprolithus floralis	Eprolithus moratus	Eprolithus side view	Flabellites oblongus	Gartnerago coxalliae	Gartnerago nanum	Gartnerago obliquum	Gartnerago praeobliquum	Gartnerago praeobliquum (small var.)	Gartnerago theta	Glaukolithus diplogrammus	Gorkae operio	Grantarhabdus coronadventis	Helenea chiastia	Hemipodorhabdus gorkae	Helicolithus anceps	Helicolithus compactus	Helicolithus compactus (small var.)	Helicolithus trabeculatus	Helicolithus trabeculatus (small var.)
NOT ASSIGNED		5750	BARREN
late Turonian	UC9b	5760 P/L												1									1		3		3			3	P	2				3				1		P			2
middle Turonian	UC8	5780 P/L												4							P		4		1		18			6	3	8		1		5				5					1			1
early Turonian	UC6	5800 P/L												P																1	7	13								1
		5830 P/L										1		1	1												2			17	30
late Cenomanian	UC5	5850 P/L		P	2							1		1													2			P		2				3				P					P
		5870 P/L				1						P		1													1			1		5		P		1	1			P	1	1
		5900 P/L		4	1	1						4															2			3						2	1			3							1
		5930 P/L																												8
middle Cenomanian	UC3	5940 P/L		P	33	3						2								1				3			2			P				P	3					4	1			1	1
		5950 P/L		P	8	2						1								P				1			1								4				1	2					1
early Cenomanian	UC1-UC2	6000 P/L		P	33						P	P			P					P				4		3	22													1								P	P
		6020 P/L		P	25							P		P					P					10		1	45			P										12				1			2
		6040 P/L		1	14									3	1					1				1			13						1							1			1			P
late Albian	NC10a (upper)	6060 P/L			4	1	1		1	1			1											1			3
		6070 P/L			60	1	2		1	1			P			3	P							P		P	12											1		2		1
		6080 P/L			30		2		1	3			2		P		P					P		P		P	1			P										P				P
		6100 P/L					3			P					P									1			1													1
		6120 P/L					2			2						1
		6130 P/L			3		8			P														1			3
	NC10a (lower)	6140 P/L				P	2		1	2														P		P		P	P	P										P
		6150 P/L			1		10	P	2	1						P								1			1	P	1														P
		6160 P/L					P																				1
		6170 P/L	1		1		P		P						P			1				P				1	P	P	P											1
No age assignment		6190	BARREN
		6200	BARREN
		6300	BARREN
		7940 limestone with some organic mudstones caved
[truncated: 31 more columns]

## Sheet: FG2-1
Age	NF Zone	Depth (ft)	Ahmuellerella octoradiata	Arkhangelskiella cymiformis	Arkhangelskiella maastrichtiensis	Axopodorhabdus albianus	Biscutum constans	Biscutum gaultensis	Broinsonia enormis	Brionsonia signata	Bukrylithus ambiguus	Calcicalathina alta	Calciosolenia fossilis	Calculites percernis	Ceratolithoides aculeus	Chiasmolithus edentulus	Chiasmolithus solitus	Chiastozygus ampiphons	Chiastozygus litterarius	Coccolithus pelagicus	Corollithion kennedyi	Corollithion signum	Cruciplacolithus tenuis	Cribrosphaerella ehrenbergii	Cylindralithus biarcus	Cylindralithus sculptus	Cylindralithus serratus	Discoaster mohleri	Discorhabdus ignotus	Eiffellithus eximius	Eiffellithus turriseiffelii	Ellipsolithus macellus	Eprolithus s.v	Eprolithus floralis	Eprolithus moratus	Fasciculithus tonii	Fasciculithus tympaniformis	Gartnerago coxalliae	Gartnerago nanum	Gartnerago obliquum	Gartnerago praeobliquum	Gartnerago praeobliquum (small var.)	Gartnerago theta	Glaukolithus diplogrammus	Grantarhabdus coronadventis	Helicolithus anceps	Helicolithus compactus	Helicolithus compactus (small var.)	Helicolithus trabeculatus
Thanetian	NP7	7600														16	8			150			1					4				24				1	30
early Maastrichtian	UC18	7800	5		10																			78		P																				21			1
		8000	12		12													1						30		4	2				10															12
early Campanian	UC13	8200	5	24					P	P														24			1			4	18									1	P					48			P
early Santonian - Coniacian	UC10- UC11	8400	4	3				1							1									54		2				3	10									6						16			1
		8580 P/L	2						2										P			3			1					36	4									3				P		1
		8780	1						1	1												2		7			1			48										7				1	1	3			1
		8980 P/L						1		1									P						2					45	P		5	1						36					1	1			P
late - middle Turonian	UC8-UC9	9200 P/L							2	1																				10	14		10	16	P					14									5
		9400 P/L	P						2													2			P					1	1									26					P	1			P
early Turonian	UC6 - UC7	9580 P/L					1	1	1	2			1									3							1		27			1				P						1
late Cenomanian	UC 5	9790 P/L				1	15	15	13	1	2			P								7		P							21		2	2							8						P
mid - early Cenomanian	UC2- UC3a	9920 P/L				1	370		6	1		P										3									8			1				P	P				1	4				1
		9950 P/L				1	480		14	1	1	1		1							1	1							1		14			P				1	2			2		1
		Samples at 9820ft, 9840ft, 9860ft, 9890ft dominated by Upper Turonian cavings.
[truncated: 52 more columns]

## Sheet: A2-1 Lower Cret
Age	NF Zone	Depth (ft)	Anfractus cf. shilohensis	Axopodorhabdus dietzmannii	Biscutum constans	Bukrylithus ambiguus	Calcicalathina oblongata	Calculites sp.	Calculites percernis	Conusphaera rothii	Cretarhabdus conicus	Crucibiscutum salebrosum	Cruciellipsis cuvillieri	Cyclagelosphaera brezae	Cyclagelopshaera margerelii	Diadorhombus rectus	Diazomatolithus lehmanii	Diloma primitiva	Discorhabdus ignotus	Eiffellithus striatus	Eiffellithus primus	Eiffellithus windii	Ethmorhabdus hauterivianus	Grantarhabdus meddii	Haqius ellipticus	Haqius circumradiatus	Helenea chistia	Helenia quadrata	Helenia staurolithina	Hemipodorhabdus gorkae	Laguncula dorotheae	Lithraphidites carniolensis	Lithraphidites aff. bollii	Lithraphidites cf. houghtonii	Lordia xenota	Manivitella pecten	Micrantholithus ?brevis	Micrantholithus hoschulzii	Micrantholithus obtusus	Metadoga mercurius	Nannoconus spp (top view)	Nannoconus spp.	Nannoconus circularis	Nannoconus cornuta	Nannoconus fragilis	Nannoconus kamptneri	Nannoconus kamptneri minor	Nannoconus globulus gp.	Nannoconus paksentaensis
		10820	Barren
late Valanginian	NC3 (late)	10850		P										P	7		2		1	1		P				1	P									1			2		24			5		4
		10880		1	1					P			P	2	8		2		P	P		P				P	P		1							P			8	P	20		1	2		2
		11190			2					P	1		1		7				3											2						P		10	2		7	1	1	P		24
		11250	P	P	P					P			2	P	13	P	8		5					P	P	P	1	P		1		P				P		3	5		33		6	10		6
		11290		1	P	P							P		30		5			1						P	P			5			P		1	6		P	P		10	1		14		10
		11350	1	2	2	1	1			1	P		P	4	90		24		9				P		1	P	3	1		1			P			2		12	1		54		3	3		18		4	2
		11390		P	1	P	1		P	P			P	10	13	P	22	P	1	P		1				P	2	P					P			3		6			36		1	18		21
		11450		1				P	P	P				2	6		1		1							P	P			1		P				1		5	4		21		P			21
		11490		3	2	P				P	P			2	6		7		1			P		P			2	P		10						2		2	3		8	1		8		18	2
		11550		P					P						5		1			1				P			1									P			1		24		1	11		6
		11590	P	P	1	1	1		P	1				2	51	P	8			P		P			P		2	P		2								4	24		39	3	2	6		3
		11690		P			P								4		7													1			P					1	P		4			2
		11750		2	2	2	P		P				P	4	21		12		4							P	P	P		1		P				1		2	3		21		P	4		21		4
		11790		P	1	1	P			1			1	1	4		8			1		P				1				2								2	1		20			15		30
late Berriasian	NC2 (late)	12850			1							1			2	1	4										P															1	1					1
		12900										2			1		P				1						P
		12990	1	P	1										10	P	60	P			P					P	2	1		5							2	1			14		1	2	2			3
		13090		P	1							P			5	1	21		P								3				1			12				P			3				1
[truncated: 35 more columns]

## Sheet: A2-1 Upper Cret
Age	NF Zone	Depth (ft)	Ahmuerella octoradiata	Arkhangelskiella cymbiformis	Axopodorhabdus albianus	Biscutum constans	Biscutum gaultensis	Broinsonia cenomanica	Broinsonia enormis	Broinsonia parca constricta	Broinsonia signata	Bukrylithus ambiguus	Chiastozygusaff. amphipons	Chiastozygus litterarius	Corollithion signum	Cribrosphaerella ehrenbergii	Cylindralithus biarcus	Cylindralithus sculptus	Discorhabdus ignotus	Eiffellithus eximius	Eiffellithus paragogus	Eiffellithus turriseiffelii	Eiffellithus vonsalisiae	Eprolithus floralis	Eprolithus moratus	Eprolithus side view	Farhania sp.	Flabellites oblongus	Gartnerago coxalliae	Gartnerago nanum	Gartnerago obliquum	Gartnerago praeobliquum	Gartnerago praeobliquum (small var.)	Gartnerago theta	Glaukolithus diplogrammus	Gorkae operio	Grantarhabdus coronadventis	Helenea chiastia	Hemipodorhabdus gorkae	Helicolithus anceps	Helicolithus compactus	Helicolithus compactus (small var.)	Helicolithus trabeculatus	Helicolithus trabeculatus (small var.)	Helicolithus leckiei	Kamptnerius magnificus	Lapideacassis cornuta	Lithastrinus grillii	Lithastrinus pentabrachius
middle Campanian	UC15c-d	7020		3						P						24		3		2											3									12			1			24
Santonian	UC12	7110	4								4					6	1	9		18		1									18									1			2			2		2
Coniacian - ?late Turonian	UC10- ?UC9C	7260	2			1	1				P				1		2			66		3		3		5					42									3			1
		7290	P						1						2		1			3		2	3	5		5	2				18									5			4
early Turonian	UC7	7410	1						1		1					2						6		35	5	42					1				1					P			1
		7500												P	2	1						39		14	82	96					16				5					2	1		1
	UC6	7590							10		2			3	4							27		21	36	48	1	3			12				27		P				2			P					1
		7650							5		3	P		4	4	P						50		4	5	21			1		7				40		1						5		P
late Cenomanian	UC5	7710			P	1			2		P	1	1	7	1	1						39		30	12	96					2	P			4			P				5	8
		7740			P	1	1		1		4		1	4	3	P						30		42	6	60		5			21				42		1	P			4		6				1
		7770			3	2	1		4		1		1	P	1	P						4		90		92					2		1		3
	UC3 -UC4	7790			6	660			15		1	1		1	3	P			1		P	40		P		1							1		25		P		P		1	1
early Cenomanian	UC2	7800			P	640			30			2		1		P			3			54		2						P			3	1	25				3
		7840			30	690			20			3							1		1	50		2				1		6				1	25				1			3
	UC1- UC2	7860			10	620			2		2	25		P	14						3	160		2				P	2				12		20		1		3		1	5
		7880			9	720		2	2		2	4		2	9						3	125		P									P		20				3		1	1	1
		7900			8	660		2	2		5	14		1	4				1		2	160		8					2				14		10				2		2	18
		7910			P	630			16		6	3		1	P						P	30		1					P	P					15	P	1		P		4
UNASSIGNED	UNASSIGNED	7940	BARREN
		8040	BARREN
		8090	BARREN
[truncated: 39 more columns]

## Sheet: ODP 1257
Age	NF Zone	CORE SAMPLE	Depth (m)	Axopodorhabdus dietzmannii	Biscutum constans	Biscutum gaultensis	Braarudosphaera africana	Braarudosphaera primula	Braarudosphaera quinquesticostata	Broinsonia galloisii	Bukrylithus ambiguus	Calcicalithina alta	Calciosolenia fossilis	Calculites dispar	Chiastozygus litterarius	Crucibiscutum neuquenensis	Crucicribrum anglicum	Discorhabdus ignotus	Eprolithus floralis	Farhania sp.	Flabellites oblongus	Glaukolithus diplogrammus	Gorkaea operio	Grantarhabdus coronadventis	Hayesites albiensis	Helenea chiastia	Hemipodorhabdus gorkae	Helicolithus leckiei	Lordia xenota	Manivitella pecten	Manivitella pemmatoidea	Markalius inversus	Nannoconus spp (top view)	Orastrum perspicuum	Owenia partitum	Prediscosphaera columnata	Repagulum parvidentatum	Retecapsa spp.	Rhagodiscus angustus	Rhagodiscus asper	Rhagodiscus achlyostaurion	Rotelapillus crenulatus	Sollasites horticus	Staurolithites sp.	Staurolithites glaber	Stoverius achylosus	Tegumentum stradneri	Tranolithus gabalus	Tranolithus phacelosus
early Middle Albian	NC8C	31-1 (45-46)	275.55	P	72	15		6	P	5	1	1	2	2	2		2	1	1	1	2	4		P	P	1		1	30	P				42	5	2	13	12	9	3	5	3	1	1	P	2	4	4	1
		31-1 CC (51-52)	276.42	1	14		P	1	P	4	1	1		P	P	P	P	P	5		1	1			1	P	3		14		2		P	2	P	1	8	12	8		5	4		1		4	P	2	1
[truncated: 4 more columns]

## Sheet: ODP 1258C
Age	NF Zone	CORE SAMPLE	Depth (m)	Ahmuellerella octoradiata	Amphizygus brooksei	Arkhangelskiella cymbiformis	Assipetra terebrodentarius	Axopodorhabdus albianus	Axopodorhabdus dietzmannii	Biscutum constans	Biscutum coronum	Biscutum gaultensis	Braarudosphaera africana	Braarudosphaera bigelowi	Braarudosphaera primula	Braarudosphaera quinquesticostata	Broinsonia cenomanicus	Broinsonia enormis	Broinsonia parca constricta	Broinsonia signata	Broinsonia galloisii	Broinsonia stenostaurion	Bukrylithus ambiguus	Calcicalithina alta	Calciosolenia fossilis	Calculites dispar	Calculites percernis	Chiastozygus litterarius	Chiastozygusplatyrhethus	Corollithion exiguum	Corollithion kennedyi	Corollithion signum	Crepidolithus burwellensis	Cretarhabdus conicus	Cretarhabdus inaequalis	Cretarhabdus loriei	Cribrosphaerella ehrenbergii	Crucibiscutum hayi	Crucibiscutum neuquenensis	Crucicribrum anglicum	Cyclagelosphaera margerelii	Cyclagelosphaera rotaclypeata	Cylindralithus coronatus	Cylindralithus nudus	Cylindralithus sculptus	Discorhabdus ignotus	Eiffellithus eximius	Eiffellithus hancockii	Eiffelithus monechiae
late Campanian	UC16	14-1 (22-24)	385.02	1	P														1																		27								1
		15-1 (56-59)	390.36	2		2					1								5																		16								2
Mid Campanian	UC15	15-3 (90-91)	393.67	2		4												P	2																		2								P		2
mid Turonian	UC9a	15-3 (100-102)	393.77									3		P				2		3			P									P											P				4
	UC8	16-1 (13-14)	394.53									2						22					3									6					P						21				11
early Turonian	UC6	17-1 (38-42)	399.78							3								P
late Cenomanian	UC5	18-1 (20-22)	404.3					P		3		4						5		P			1
		19-1 (66-68)	409.76					5		4		35						7		P			1									P
		20-1 (70-72)	414.2					3		120		120						35		2			2
	UC3	21-1 (102-104)	419.72					2		560								180		4			3						1		1	6
		22-1 (61-63)	423.91					55	P	720								30		2			14					P	P		2	13														2
early Cenomanian	UC2	23-1 (65-66)	428.95					P		810		24						21		1			3								P	3					1									24
		24-1 (33-36)	433.23					2		660								12		4			10					4			1	12														3
		25-1 (42-44)	438.32					3		900							P	27		6			15								P	6					P									4
	UC1	26-1 (20-22)	442.7					1	P	630							P	1		3	1	P	18					P	P		P	4					1									P
		27-1 (8-9)	447.58					6		320								1		5		2	2		1						?P						P									7
?early Cenomanian	?UC1	27-2 (15-16)	449.06							54					P					1	1		2					3				P
late Albian	NC10a (lower)	27-2 (83-84)	449.74						3	180		24			1						16	1	21				P	6				1				1		P								60			2
		27-2 (115-116)	450.06					2	4	210		4			1						4	1	14				P			18						1										16			5
	NC9a	27-3 (4-5)	450.45					P	P	2		1											4				2	1		1						P				P				P		1
		28-1 (5-6)	451.85						P	210													24					4		1						P								1
		28-2 (12-13)	453.42					P		14		1									P	P	10					2				P					P	P			P			1
		28-CC (2-3)	454.2					P		180												P	4		1			3		1							P			P	P					3
		29-1 (4-5)	456.84					1		42		5											16		1		1	1		1						1	P							2
late middle Albian - early late Albian		29-3 (5-6)	459.85					P	P	1											P	5	4					2		1						P				1						1
		30-1 (5-6)	461.45					6				5			1							1	4					2		1								1
		30-2 (5-6)	462.67					P	P	24												2	8					P								P		1								1
		30-3(4-5)	464.16							4		2				P					P		P												1	1		2								P
		31-1 (4-5)	466.44					P	P	42						1					P	1	7					4						P				P		1						1
		31-2 (4-5)	467.94				3	P		84		P									P		20					3				2		1				2		1						2
		31-3 (4-5)	469.44					1	2	40		P			P	P					1	1	6		1			P				5				P				4						1
		32-1 (132-133)	472.32				1	4		90		P										P	1				P	5		1				P						2						1
		32-2 (82-83)	473.19				P	3	1	170												P	5					5				P								2		1				4
		33-1 (142-143)	477.42				1	2	1	180					1						P	1	5		2			3				5					P			2						2
		33-2 (138-139)	478.88				P			1
		33-3 (58-59)	479.58					5		480		1			5								2		16	P	2	2				10								6				P		4
		34-1 (122-123)	481.92					2	1	240													3					3				1								1						3
		34-2 (132-133)	483.52					4	P	112											P		3					12											P	1						1
		34-3 (45-46)	484.15					7	1	200											1		21		10			16				15							1	3						3
		34-3 (112-113)	484.82					3	P	160					2								18		3			10		1		48			2				P	1				P		8
		29-2(5-6): 458.35m: V. POOR NON-DIAGNOSTIC
		27-2 (42-43)..449.33m and 27-2 (59-60): 449.50m both calcified and barren
[truncated: 95 more columns]

## Sheet: ODP 1260A
Age	NF Zone	CORE SAMPLE	Depth (m)	Axopodorhabdus dietzmannii	Biscutum constans	Broinsonia galloisii	Broinsonia stenostaurion	Bukrylithus ambiguus	Chiastozygus litterarius	Corollithion signum	Crucibiscutum neuquenensis	Crucicribrum anglicum	Eprolithus floralis	Farhania sp.	Flabellites oblongus	Gartnerago coxalliae	Glaukolithus diplogrammus	Grantarhabdus coronadventis	Hayesites albiensis	Helenea chiastia	Hemipodorhabdus gorkae	Helicolithus compactus	Lordia xenota	Manivitella pemmatoidea	Prediscosphaera columnata	Percivalia fenestrata	Repagulum parvidentatum	Retecapsa spp.	Retecapsa angustiforata	Rhagodiscus angustus	Rhagodiscus asper	Rhagodiscus achlyostaurion	Rotelapillus crenulatus	Stoverius achylosus	Tegumentum stradneri	Tranolithus gabalus	Tranolithus phacelosus	Watznaueria barnesae	Zeugrhabdotus embergeri	Zeughrhabdotus howei	Zeugrhadotus moulladei
early Middle Albian	NC8C	54-3 (70)	491.3	P	2			2	P	P	1	2	2	2		1		P	2	1	1		2		11		1	4		2	P	7	2	1			1	18		11	22
		54 (CC)	491.32	1	8	1	P	3		1		2	P			P	1				1	P	1	P	4	1	2	10		2	2	4	1	1	1	1	1	5	P	8	15

## Sheet: DSDP 144
Age	NF Zone	CORE SAMPLE	Depth (m)	Ahmuellerella octoradiata	Amphizygus brooksei	Anfractus shilohensis	Arkhangelskiella cymbiformis	Axopodorhabdus albianus	Axopodorhabdus dietzmannii	Biscutum constans	Biscutum coronum	Biscutum gaultensis	Braarudosphaera primula	Braarudosphaera quinquesticostata	Braarudosphaera stenorhetha	Broinsonia enormis	Broinsonia parca constricta	Broinsonia signata	Broinsonia galloisii	Bukrylithus ambiguus	Calcicalithina alta	Calciosolenia fossilis	Calculites dispar	Chiastozygus litterarius	Corollithion signum	Cretarhabdus conicus	Cretarhabdus inaequalis	Cretarhabdus loriei	Cribrosphaerella ehrenbergii	Crucicribrum anglicum	Cylindralithus sculptus	Discorhabdus ignotus	Eiffellithus eximius	Eiffelithus paragogus	Eiffellithus turriseiffelii	Eprolithus floralis	Farhania sp.	Flabellites oblongus	Gartnerago coxalliae	Gartnerago obliquum	Gartnerago praeobliquum	Glaukolithus diplogrammus	Gorkaea operio	Grantarhabdus coronadventis	Hayesites albiensis	Helenea chiastia	Hemipodorhabdus gorkae	Helicolithus anceps	Helicolithus trabeculatus
late Campanian	UC16	3-1 (125-126)	163.25	1			8																			1			54		6				7					4								1	P
		4-2 (146-148)	173.96	2			2				1						P												18		P				1					2								1
mid - late Turonian	UC9	5-1 (15-106)	181.05		P											3		P		1													2		11	1				7								4	2
late Cenomanian	UC5	4-2 (96-98)	215.46					7								15		12		2					4										78	42				4	39	14	P	3				3
		4-3 (36-38)	216.36					6	1			3				18		15		5					1										130	30			2	15	33	8		P				1
early middle Albian	NC8C	5-1 (14-16)	264.14						P	4									7	3				2		P								P		1	1	P				7					1
		5-1 (125-127)	265.25						1	15			3						5					2			P			1				1		3	P	2				15	1		P
		6-1 (126-128)	296.26			P				P			2		P				P											P						1		P				1					P
		7-1 (73-75)	298.73																4	P				1						P						2	P					2
		7-1 (128-130)	299.28			1		P		1		P	3	1	P				3	1	P			P				P		P								P				P		P		P	P
		8-3 (103-105)	328.03			2							1										P	P												P						1
		8-3 (135-137)	328.35			5				1			P						2				P							P		P				2		P
		8-2 (15-17): 325.65m: Barren
		All samples from Borehole 144 except 181.05m and 173.96m which are from 144A
[truncated: 52 more columns]
